# Supplementary material
Source: PubMed Central journal article supplement (PMC4529816)
Supplement: NIHMS700912-supplement-3.pdf [file NIHMS700912-supplement-3.pdf]

**Supplementary Table and Figures for de Kwon *et al.* “Selective inhibition of SIN3 corepressor with avermectins as a novel therapeutic strategy in triple negative breast cancer”**

Page

**Supplementary Tables**

Supplementary Table 1: qPCR primers used in this study ..... 1

**Supplementary Figures**

Supplementary Figure S1: Structures of compounds screened in Figure 1A and 1B.....2

Supplementary Figure S2: Proximity ligation assay (PLA) analyzing SIN3A-MAD interactions.....3

**Supplementary Table 1: qPCR primers used in this study**

| <b>Gene</b>      | <b>Forward Primer 5'-3'</b> | <b>Reverse Primer 5'-3'</b> |
|------------------|-----------------------------|-----------------------------|
| <b>Human</b>     |                             |                             |
| <i>CDH1</i>      | GTCATGGAAGGTGCTCTTCC        | GGATCTTGGCTGAGGATGG         |
| <i>ESR1</i>      | GATCCACCTGATGGCCAAG         | ACAGATGCTCCATGCCTTTG        |
| <i>PGR</i>       | GATTCAGAAGCCAGCCAGAG        | TGCCTCTCGCCTAGTTGATT        |
| <i>MMP9</i>      | CCCTCAGTGAAGCGGTACAT        | TTGACAGCGACAAGAAGTGG        |
| <i>MT1/MMP14</i> | CACTGCCCTACGAGAGGAAGG       | TTGGGGTACTCGCTATCCAC        |
| <i>NANOG</i>     | TTTGTGGCCTGAAGAAAAC         | AGGGCTGTCTGAATAAGCAG        |
| <i>SOX2</i>      | TACAGCATGTCTACTCGCAG        | GAGGAAGAGGTAACACAGGG        |
| <i>RPL30</i>     | GACAAGGCAAAGCGAAATTG        | GTATTTTCCGCATGCTGTGC        |
| <i>GAPDH</i>     | TCATCATCTCTGCCCCCTCT        | TCCGACGCCTGCTTCACCAC        |
| <b>Mouse</b>     |                             |                             |
| <i>Cdh1</i>      | CAGCCTTCTTTTCGGAAGACT       | GGTAGACAGCTCCCTATGACTG      |
| <i>Esr1</i>      | ATGTCTCACTCAGGGAAGGTGT      | ACAAAAATCCTGGGAGACTGAA      |
| <i>Gapdh</i>     | TGCACCAACAACCTGCTTA         | GGATGCAGGGATGATGTT          |

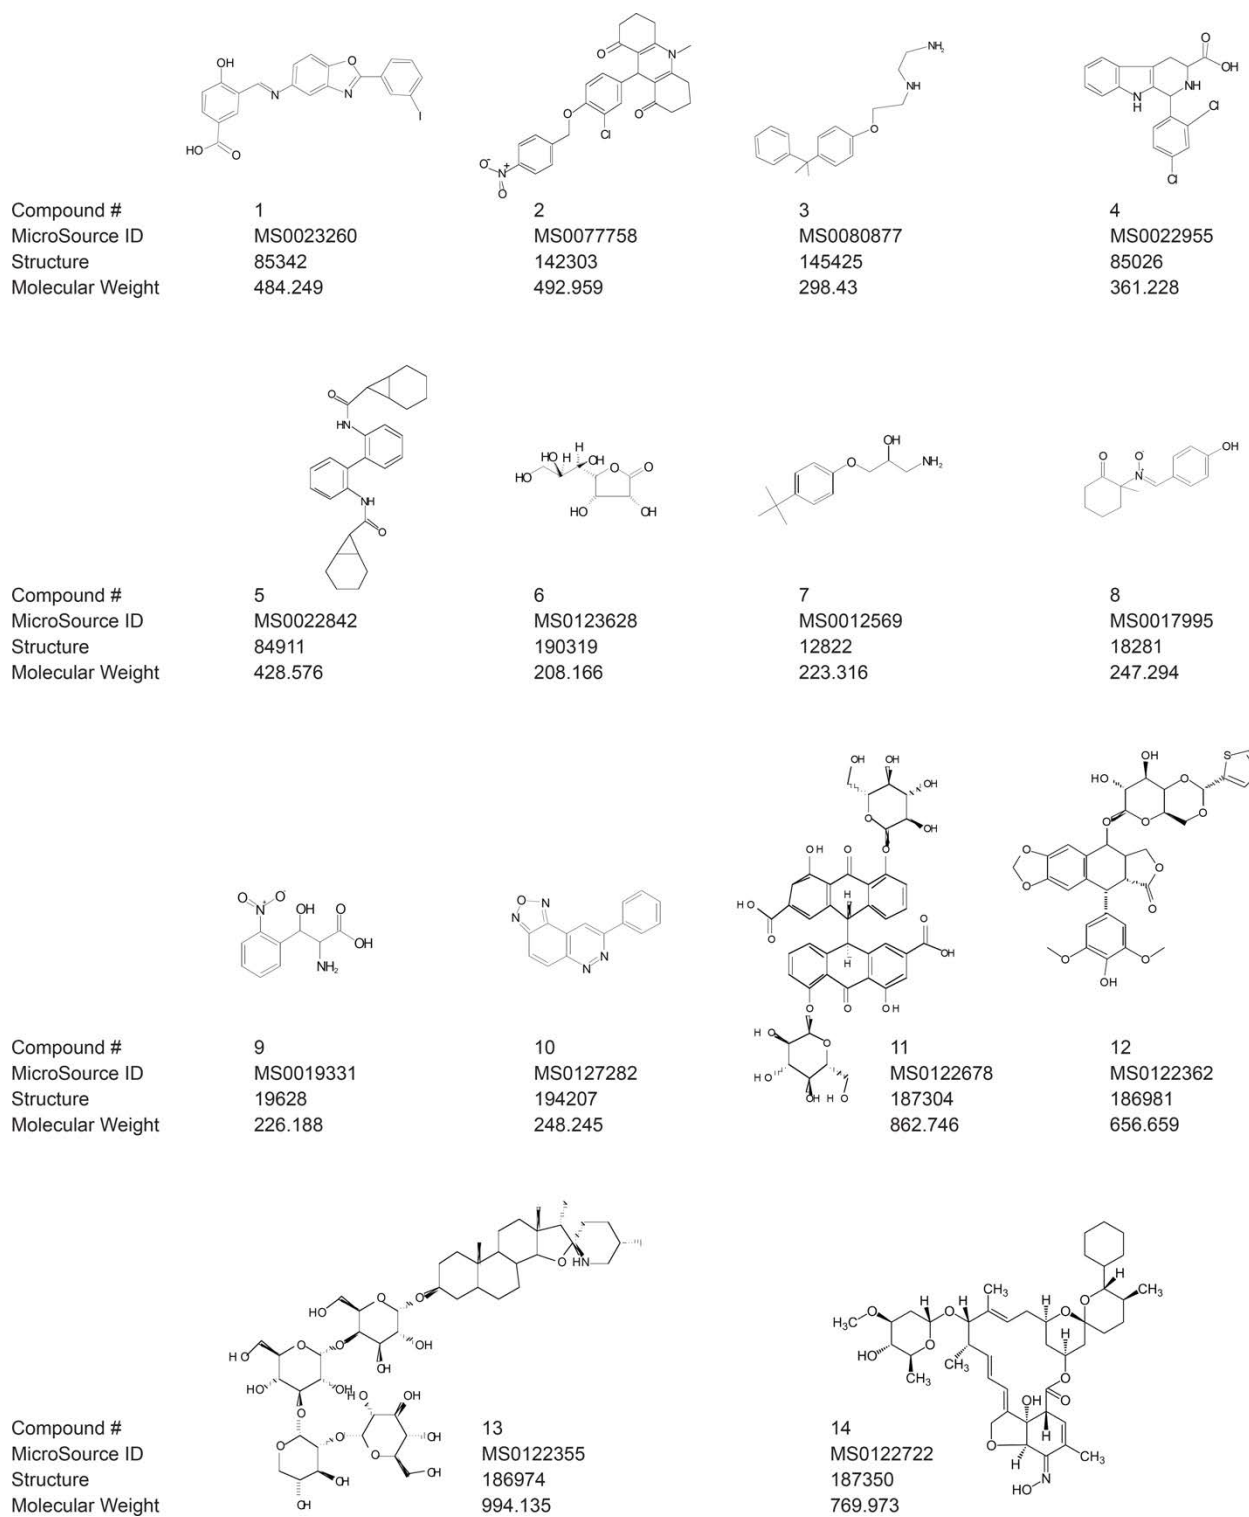

**Supplementary Figure 1.**  
Structures of compounds screened in Figure 1A and 1B.

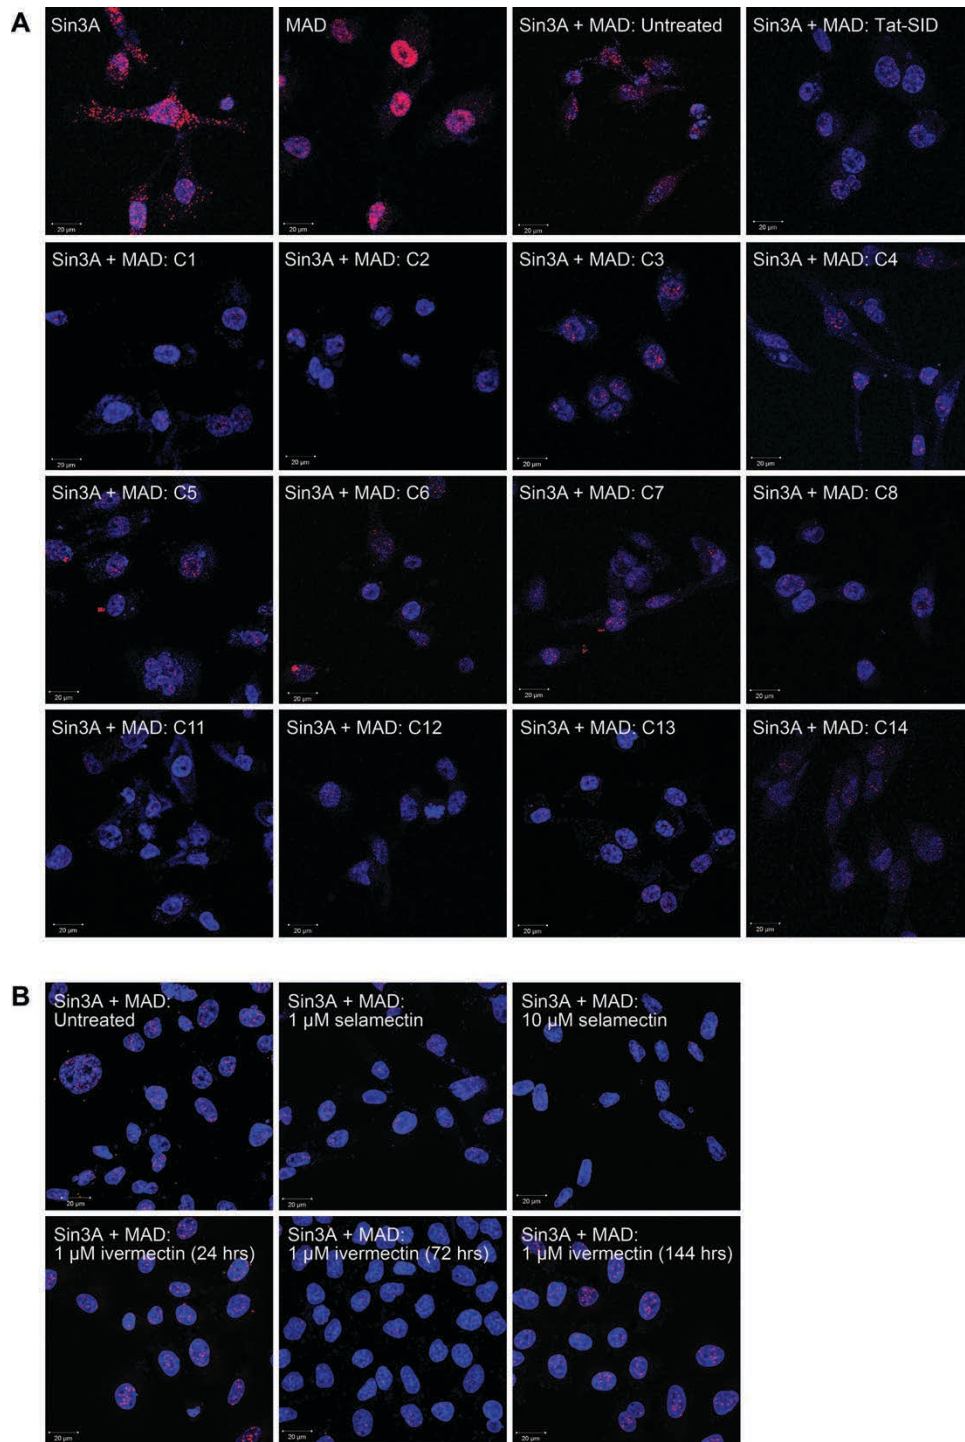

**Supplementary Figure 2.**

Proximity ligation assay (PLA) analyzing SIN3A-MAD interactions.

**A**, Cells were treated for 24 hours with 15  $\mu$ M SID peptide or compounds (10  $\mu$ M) as indicated and analysed by PLA. Panels show close proximity (< 40 nm) of antibody conjugated PLA probes that have been ligated, amplified and detected with complementary fluorescent probes. Red dots represent the presence of SIN3A or MAD protein, or SIN3A-MAD interactions as indicated. Antibodies used and treatment are indicated by white text. Scale bars indicate 20  $\mu$ m.

**B**, PLA analysis of SIN3A-MAD interactions corresponding to treatment with indicated concentrations of selamectin (Fig. 1D) or ivermectin (Fig. 1F) are shown.
